# Supplementary material for: A zigzag fused-ring building block for polymer solar cells
Source: Royal Society of Chemistry journal article supplement (doi:10.1039/c6nj00067c), 2016-01-01
Supplement: c6nj00067c1.pdf [file c6nj00067c1.pdf]

## Supporting Information

### **A zigzag fused-ring building block for polymer solar cells**

Nan Xiao,<sup>a,b</sup> Liu Qian,<sup>b</sup> Jiamin Cao,<sup>b</sup> Xiaojuan Zhao,<sup>b</sup> Aihong Han<sup>\*a</sup> and Liming Ding<sup>\*b</sup>

<sup>a</sup> *College of Chemistry and Life Science, Shenyang Normal University, Shenyang 110034, China. E-mail: hanhong@hotmail.com*

<sup>b</sup> *Center for Excellence in Nanoscience, National Center for Nanoscience and Technology, Beijing 100190, China. E-mail: ding@nanoctr.cn*

- 1. General characterization**
- 2. Synthesis**
- 3. <sup>1</sup>H NMR**
- 4. TGA**
- 5. CV**
- 6. Device fabrication and measurements**
- 7. Optimization of device performance**
- 8. AFM**
- 9. XRD**

## 1. General characterization

$^1\text{H}$  and  $^{13}\text{C}$  NMR spectra were measured on a Bruker Avance-400 spectrometer. Absorption spectra were recorded on a Shimadzu UV-1800 spectrophotometer. Gel permeation chromatography (GPC) was performed on a Waters 1515 series GPC coupled with UV-vis detector using tetrahydrofuran as eluent and polystyrenes as standards. Thermogravimetric analysis was done by using a Perkin-Elmer Diamond TG/DTA thermal analyzer under nitrogen. Cyclic voltammetry was done on a Shanghai Chenhua CHI620D voltammetric analyzer under argon in an anhydrous acetonitrile solution of tetra-*n*-butylammonium hexafluorophosphate (0.1 M). A glassy carbon electrode was used as the working electrode, a platinum-wire was used as the counter electrode, and a  $\text{Ag}/\text{Ag}^+$  electrode was used as the reference electrode. Polymers were coated onto glassy carbon electrode and all potentials were corrected against  $\text{Fc}/\text{Fc}^+$ . AFM was performed on a Dimension 3100 microscope (Veeco) using tapping mode. X-ray diffraction (XRD) of thin films was performed on a Rigaku D/max-2500 X-ray diffractometer in reflection mode by using  $\text{Cu K}\alpha$  radiation (40 kV, 200 mA).

## 2. Synthesis

All reagents were purchased from Alfa Aesar Co., Aladdin Co., J&K Co., Lyntech Co. and other commercial suppliers. All reactions dealing with air- or moisture-sensitive compounds were carried out using standard Schlenk techniques. 1,5-Dibromonaphthalene-2,6-dicarboxylic acid (**1**)<sup>1</sup> and *N*-(2-octyldodecyl)thiophen-3-amine<sup>2</sup> were prepared according to literatures.

**1,5-Dibromo-*N*<sup>2</sup>,*N*<sup>6</sup>-bis(2-octyldodecyl)-*N*<sup>2</sup>,*N*<sup>6</sup>-di(thiophen-3-yl)naphthalene-2,6-dicarboxamide (**2**).** To a solution of 1,5-dibromonaphthalene-2,6-dicarboxylic acid (**1**) (0.99 g, 2.65 mmol) in dry  $\text{CH}_2\text{Cl}_2$  (50 mL) were added oxalyl chloride (3 mL, 45.6 mmol) and 2 drops of DMF. The mixture was stirred at room temperature overnight. The solvent was removed under reduced pressure to obtain 1,5-dibromonaphthalene-2,6-dichloride, which was used in next step without purification. To the solution of 1,5-dibromonaphthalene-2,6-dichloride in dry  $\text{CH}_2\text{Cl}_2$  (30 mL) was slowly added a solution of *N*-(2-octyldodecyl)thiophen-

3-amine (2.5 g, 14.5 mmol) and Et<sub>3</sub>N (2 mL) in dry CH<sub>2</sub>Cl<sub>2</sub> (30 mL) at 0 °C. The mixture was stirred at room temperature overnight. Then the mixture was poured into water and extracted with CHCl<sub>3</sub> for three times. The organic layer was dried over anhydrous Na<sub>2</sub>SO<sub>4</sub>. After removal of the solvent, the crude product was then purified via silica gel column by using CH<sub>2</sub>Cl<sub>2</sub> as eluent to give compound **2** as a yellow solid (2.38 g, 81.8%). <sup>1</sup>H NMR (CDCl<sub>3</sub>, 400 MHz, δ/ppm): 8.05 (d, *J* = 8.8 Hz, 2H), 7.20 (d, *J* = 8.8 Hz, 2H), 7.00-7.02 (m, 2H), 6.93 (br, 2H), 6.81 (d, *J* = 4.8 Hz, 2H), 4.03 (br, 2H), 3.69 (br, 2H), 1.65-1.59 (br, 2H), 1.35-1.26 (m, 64H), 0.90-0.87 (m, 12H). <sup>13</sup>C NMR (CDCl<sub>3</sub>, 100 MHz, δ/ppm): 168.71, 139.66, 138.67, 131.95, 127.05, 126.18, 125.41, 120.80, 119.89, 52.09, 36.17, 31.91, 31.90, 31.20, 30.05, 29.63, 29.58, 29.34, 29.31, 26.31, 22.68, 14.11.

**7,14-Bis(2-octyldodecyl)thieno[3',2':3,4]isoquinolino[6,5-*f*]thieno[3,2-*c*]isoquinoline-6,13(7*H*,14*H*)-dione (zTITI).** To a solution of compound **2** (1.28 g, 1.17 mmol) in N,N-dimethylacetamide (60 mL) were added PCy<sub>3</sub>·HBF<sub>4</sub> (300 mg, 0.81 mmol), Cs<sub>2</sub>CO<sub>3</sub> (1.5 g, 4.6 mmol) and Pd(OAc)<sub>2</sub> (150 mg, 0.67 mmol) under Ar. The mixture was stirred at 120 °C overnight and then cooled to room temperature. The mixture was poured into ice water and extracted with CHCl<sub>3</sub> for three times. The combined organic layer was washed with brine and dried over anhydrous Na<sub>2</sub>SO<sub>4</sub>. The solvent was removed under reduced pressure and the crude product was then purified via silica gel column by using petroleum ether/CH<sub>2</sub>Cl<sub>2</sub> (1:4) as eluent to give **zTITI** as a yellow solid (719 mg, 65.7%). <sup>1</sup>H NMR (CDCl<sub>3</sub>, 400 MHz, δ/ppm): 9.10 (d, *J* = 9.0 Hz, 2H), 8.85 (d, *J* = 9.0 Hz, 2H), 7.72 (d, *J* = 5.6 Hz, 2H), 7.28 (d, *J* = 5.7 Hz, 2H), 4.39 (br, 4H), 2.09 (br, 2H), 1.42-1.20 (m, 64H), 0.86-0.81 (m, 12H). <sup>13</sup>C NMR (CDCl<sub>3</sub>, 100 MHz, δ/ppm): 161.51, 141.36, 131.51, 130.31, 127.65, 126.69, 124.06, 123.42, 117.13, 115.64, 49.72, 37.15, 31.88, 31.84, 31.65, 29.95, 29.59, 29.53, 29.49, 29.29, 29.25, 26.64, 22.64, 22.62, 14.06.

**2,9-Dibromo-7,14-bis(2-octyldodecyl)thieno[3',2':3,4]isoquinolino[6,5-*f*]thieno[3,2-*c*]isoquinoline-6,13(7*H*,14*H*)-dione (zTITI-Br).** To a solution of **zTITI** (109 mg, 0.117 mmol) in mixed solvents of CHCl<sub>3</sub> (15 mL) and DMF (10 mL) was added NBS (45.6 mg, 0.256 mmol) under Ar. The mixture was stirred at room temperature for 24 h in the dark, and then

was poured into water and extracted with  $\text{CHCl}_3$  for three times. The combined organic layer was washed with brine and dried over anhydrous  $\text{Na}_2\text{SO}_4$ . The solvent was removed under reduced pressure and the crude product was then purified via silica gel column by using petroleum ether/ $\text{CH}_2\text{Cl}_2$  (1:3) as eluent to give **zTITI-Br** as a yellow solid (86 mg, 67.7%).  $^1\text{H}$  NMR ( $\text{CDCl}_3$ , 400 MHz,  $\delta/\text{ppm}$ ): 8.79 (br, 4H), 7.25 (s, 2H), 4.31 (br, 4H), 2.05 (br, 2H), 1.38-1.21 (m, 64H), 0.87-0.82 (m, 12H).  $^{13}\text{C}$  NMR ( $\text{CDCl}_3$ , 100 MHz,  $\delta/\text{ppm}$ ): 161.04, 140.90, 130.98, 130.03, 126.88, 123.85, 123.59, 120.17, 117.03, 116.60, 49.92, 37.10, 31.90, 31.86, 31.66, 29.97, 29.61, 29.54, 29.50, 29.30, 29.26, 26.59, 22.65, 22.62, 14.03. MALDI-TOF MS ( $m/z$ ): 1093.6 ( $\text{M}^+$ ).

**Poly{2,5-thiophene-alt-2,9-(7,14-bis(2-octyldodecyl))thieno[3',2':3,4]isoquinolino[6,5-*f*]thieno[3,2-*c*]isoquinoline-6,13(7*H*,14*H*)-dione} (PThzTITI).** **zTITI-Br** (87.6 mg, 0.080 mmol) and 2,5-bis(trimethylstannyl)thiophene (32.8 mg, 0.080 mmol) were dissolved in 30 mL toluene, and the solution was flushed with argon for 15 min, then 8 mg  $\text{Pd}(\text{PPh}_3)_4$  was added into the solution. The mixture was flushed again with argon for 20 min. The reaction solution was heated to reflux for 24 h. Then the solution was cooled to room temperature and added dropwise to 150 mL methanol. The precipitate was collected and further purified by Soxhlet extraction with methanol, hexane and chloroform in sequence. The chloroform fraction was concentrated and added dropwise into methanol. Then the precipitate was collected and dried under vacuum overnight to give **PThzTITI** as a dark red solid (62 mg, 76.3%).  $^1\text{H}$  NMR ( $\text{CDCl}_3$ , 400 MHz,  $\delta/\text{ppm}$ ): 8.86 (br, 4H), 7.52-6.17 (br, 4H), 4.37 (br, 4H), 2.11-0.81 (br, 78H). Elemental analysis (%) calcd for  $\text{C}_{64}\text{H}_{90}\text{N}_2\text{O}_2\text{S}_3$ : C, 75.69; H, 8.93; N, 2.76. Found: C, 75.54; H, 8.91; N, 2.81.

**Poly{2,5-selenophene-alt-2,9-(7,14-bis(2-octyldodecyl))thieno[3',2':3,4]isoquinolino[6,5-*f*]thieno[3,2-*c*]isoquinoline-6,13(7*H*,14*H*)-dione} (PSezTITI).** **PSezTITI** was synthesized by following the same procedures for **PThzTITI**. **zTITI-Br** (97.3 mg, 0.087 mmol) and 2,5-bis(trimethylstannyl)selenophene (40.6 mg, 0.087 mmol) were used as start materials. **PSezTITI** was obtained as a dark purple solid (90 mg, 95.2%).  $^1\text{H}$  NMR ( $\text{CDCl}_3$ , 400 MHz,  $\delta/\text{ppm}$ ): 8.85 (br, 4H), 7.52-6.28 (br, 4H), 4.40 (br, 4H), 2.11-0.81 (br, 78H). Elemental analysis

(%) calcd for  $C_{64}H_{90}N_2O_2S_2Se$ : C, 72.35; H, 8.54; N, 2.64. Found: C, 72.37; H, 8.35; N, 2.77.

### 3. $^1\text{H}$ NMR

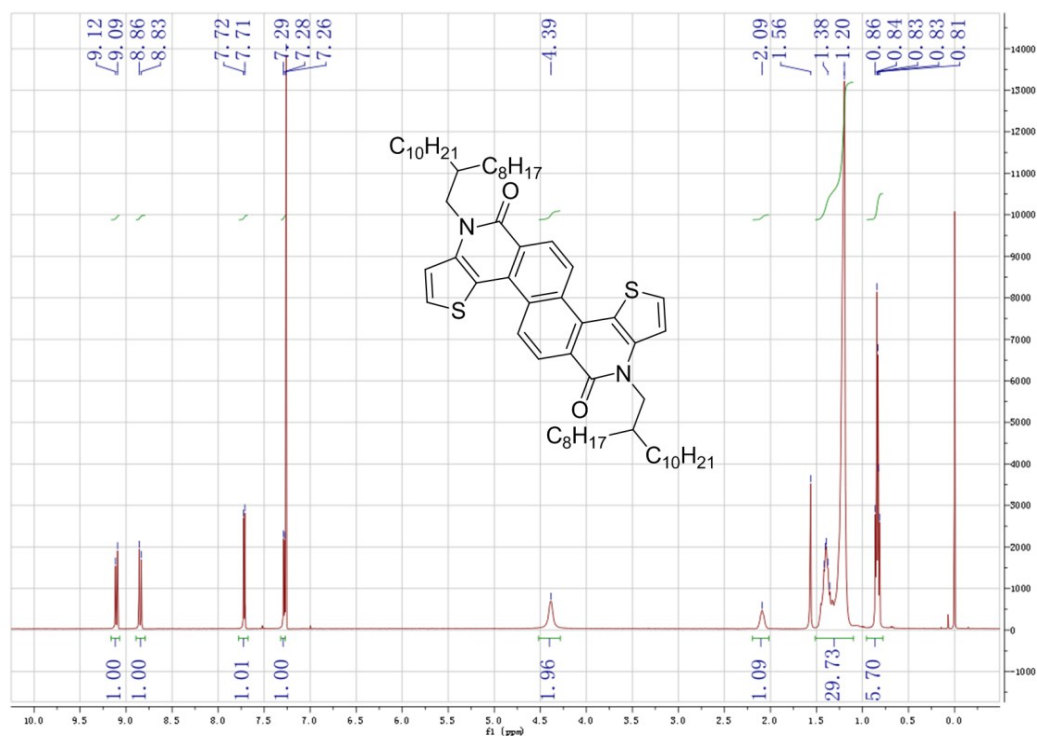

Fig. S1  $^1\text{H}$  NMR spectrum of zTITI.

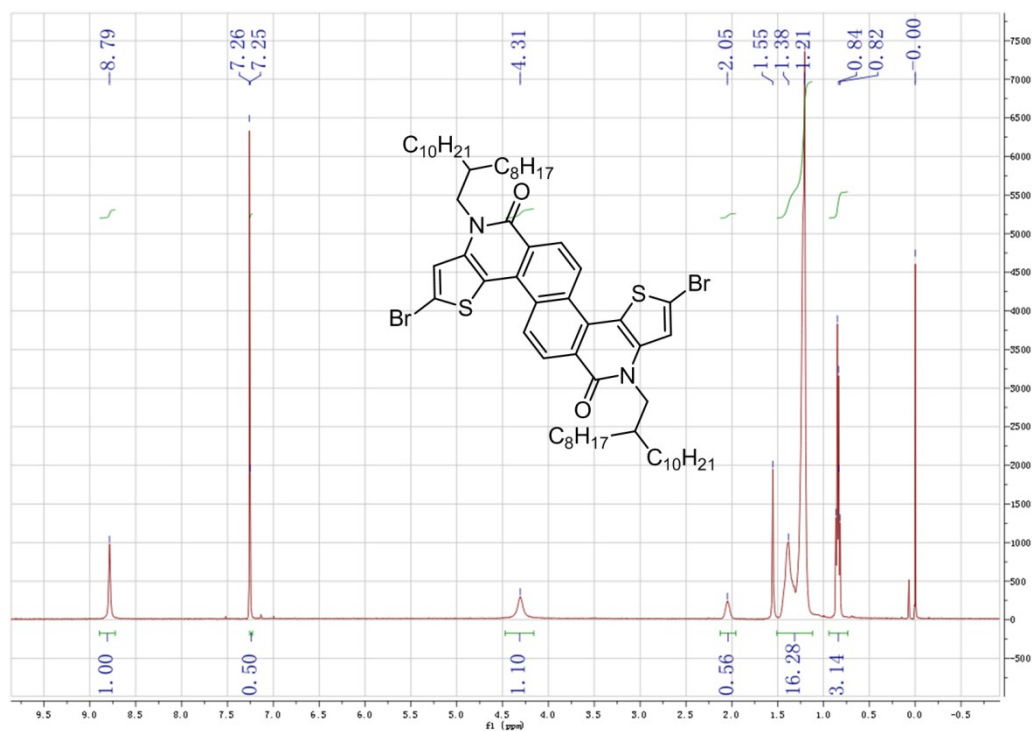

Fig. S2  $^1\text{H}$  NMR spectrum of zTITI-Br.

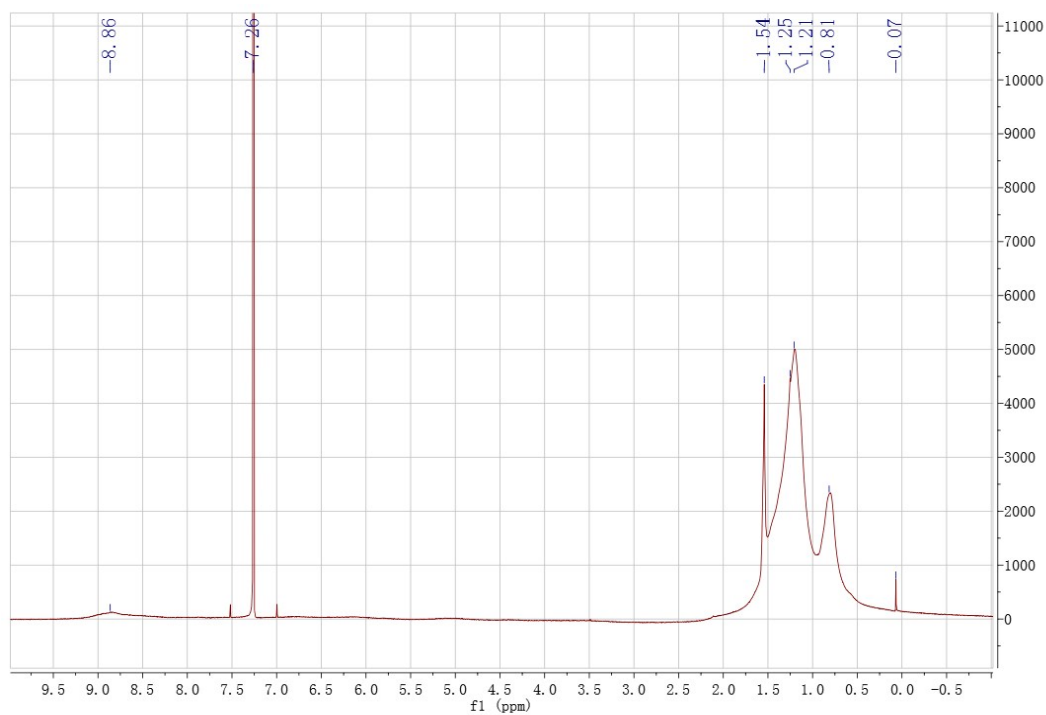

**Fig. S3**  $^1\text{H}$  NMR spectrum of PThzTITl.

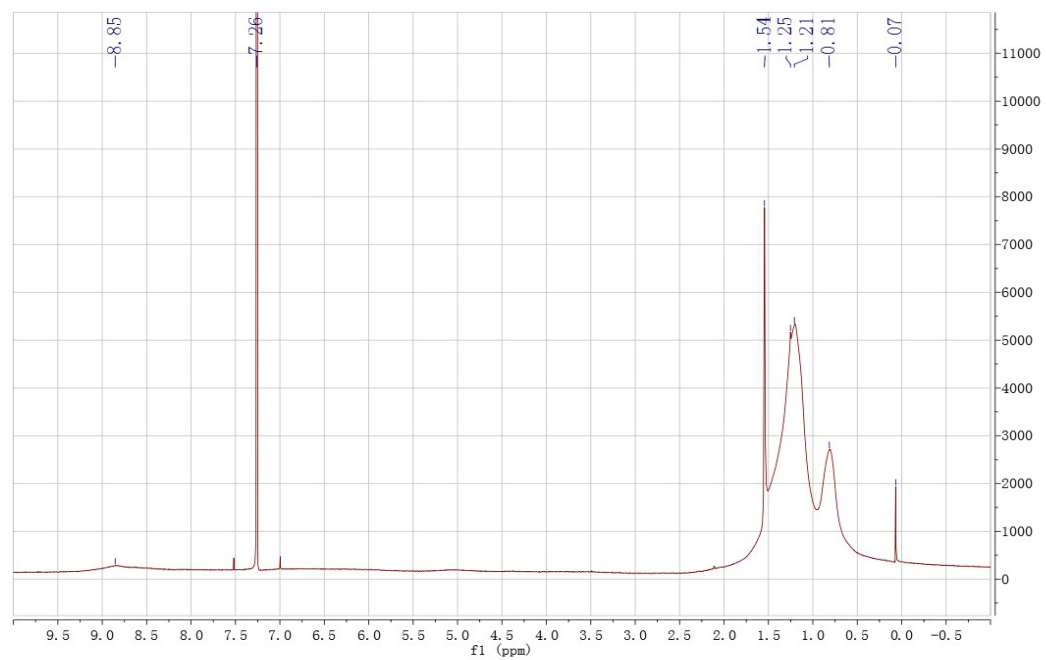

**Fig. S4**  $^1\text{H}$  NMR spectrum of PSezTITl.

#### 4. TGA

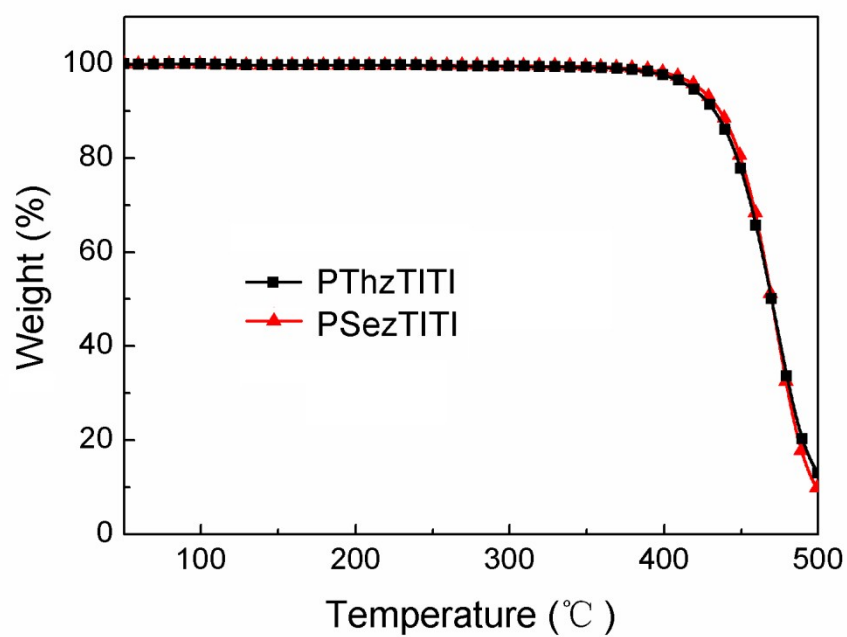

**Fig. S5** TGA curves for PThzTITI and PSezTITI.

#### 5. CV

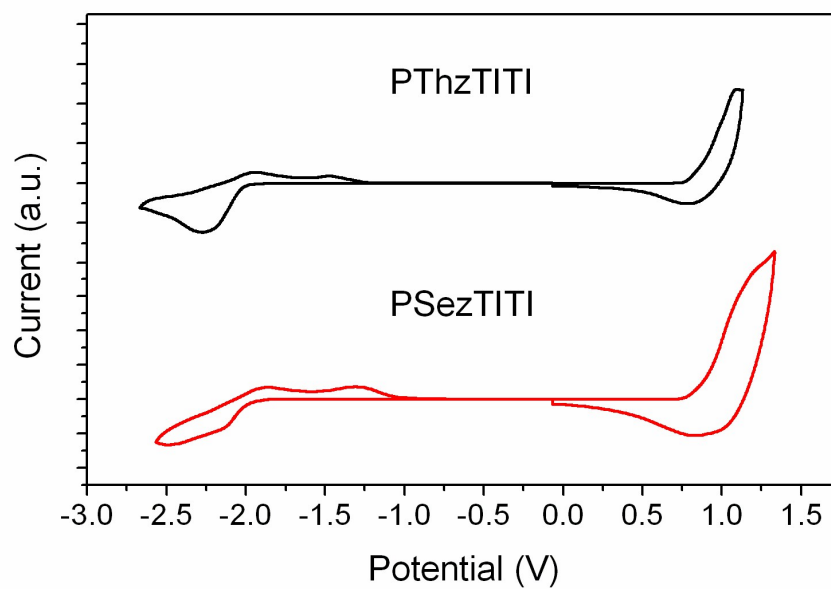

**Fig. S6** Cyclic voltammograms for PThzTITI and PSezTITI.

## 6. Device fabrication and measurements

### Hole-only devices

The structure of hole-only devices is ITO/PEDOT:PSS/active layer/MoO<sub>3</sub>/Al. A 30 nm thick PEDOT:PSS layer was made by spin coating an aqueous dispersion onto ITO glass (4000 rpm for 30 s). PEDOT:PSS coated substrates were dried at 150 °C for 10 min. A polymer:PC<sub>71</sub>BM blend in CB with 3 vol% DIO was spin-coated onto PEDOT:PSS layer. Finally, MoO<sub>3</sub> (~6 nm) and Al (~100 nm) were successively evaporated onto the active layer under a shadow mask (pressure ca. 10<sup>-4</sup> Pa). *J-V* curves were measured by using a computerized Keithley 2420 SourceMeter in the dark.

### Space-charge limited current (SCLC) measurements

Charge carrier mobility was measured by SCLC method. The mobility was determined by fitting the dark current to the model of a single carrier SCLC, which is described by:

$$J = \frac{9}{8} \epsilon_0 \epsilon_r \mu \frac{V^2}{d^3}$$

where *J* is the current density, *μ* is the zero-field mobility of holes (*μ<sub>h</sub>*), *ε<sub>0</sub>* is the permittivity of the vacuum, *ε<sub>r</sub>* is the relative permittivity of the material, *d* is the thickness of the blend film, and *V* is the effective voltage, *V* = *V<sub>appl</sub>* - *V<sub>bi</sub>*, where *V<sub>appl</sub>* is the applied voltage, and *V<sub>bi</sub>* is the built-in potential determined by electrode workfunction difference. The mobilities were calculated from the slope of *J*<sup>1/2</sup>-*V* plots.

## 7. Optimization of device performance

**Table S1** Optimization of D/A ratio for PThzTITI:PC<sub>71</sub>BM solar cells.<sup>a</sup>

| D/A   | $V_{oc}$ | $J_{sc}$              | FF   | PCE  |
|-------|----------|-----------------------|------|------|
| [w/w] | [V]      | [mA/cm <sup>2</sup> ] | [%]  | [%]  |
| 1:0.6 | 1.07     | 1.47                  | 55.4 | 0.87 |
| 1:0.8 | 1.06     | 1.53                  | 56.1 | 0.91 |
| 1:1.0 | 1.07     | 1.61                  | 55.5 | 0.96 |
| 1:1.2 | 1.08     | 1.46                  | 56.7 | 0.90 |
| 1:1.4 | 1.08     | 1.35                  | 57.8 | 0.84 |

<sup>a</sup> Blend solution: 14 mg/mL in CB with 3 vol% DIO; spin coating: 1200 rpm for 60 s.

**Table S2** Optimization of the active layer thickness for PThzTITI:PC<sub>71</sub>BM solar cells.<sup>a</sup>

| Thickness | $V_{oc}$ | $J_{sc}$              | FF   | PCE  |
|-----------|----------|-----------------------|------|------|
| [nm]      | [V]      | [mA/cm <sup>2</sup> ] | [%]  | [%]  |
| 90        | 1.04     | 1.41                  | 56.1 | 0.82 |
| 97        | 1.04     | 1.53                  | 60.2 | 0.96 |
| 110       | 1.05     | 1.48                  | 60.3 | 0.94 |
| 119       | 1.05     | 1.48                  | 59.6 | 0.93 |
| 127       | 1.07     | 1.37                  | 59.8 | 0.88 |
| 132       | 1.04     | 1.32                  | 59.4 | 0.82 |

<sup>a</sup> D/A ratio: 1:1 (w/w); blend solution: 14 mg/mL in CB with 3 vol% DIO.

**Table S3** Optimization of the additive content for PThzTITl:PC<sub>71</sub>BM solar cells.<sup>a</sup>

| DIO      | $V_{oc}$ | $J_{sc}$              | FF   | PCE  |
|----------|----------|-----------------------|------|------|
| [v/v, %] | [V]      | [mA/cm <sup>2</sup> ] | [%]  | [%]  |
| 0        | 0.94     | 0.54                  | 46.4 | 0.24 |
| 1        | 0.99     | 1.24                  | 51.0 | 0.63 |
| 2        | 1.04     | 1.48                  | 57.2 | 0.89 |
| 3        | 1.08     | 1.60                  | 56.8 | 0.98 |
| 4        | 1.03     | 1.30                  | 56.7 | 0.76 |

<sup>a</sup> D/A ratio: 1:1 (w/w); blend solution: 14 mg/mL in CB; spin coating: 1500 rpm for 40 s.

**Table S4** Optimization of D/A ratio for PSezTITl:PC<sub>71</sub>BM solar cells.<sup>a</sup>

| D/A   | $V_{oc}$ | $J_{sc}$              | FF   | PCE  |
|-------|----------|-----------------------|------|------|
| [w/w] | [V]      | [mA/cm <sup>2</sup> ] | [%]  | [%]  |
| 1:0.6 | 1.06     | 3.21                  | 57.3 | 1.95 |
| 1:0.8 | 1.07     | 3.43                  | 60.7 | 2.23 |
| 1:1.0 | 1.04     | 3.29                  | 63.8 | 2.19 |
| 1:1.2 | 1.04     | 3.09                  | 64.0 | 2.05 |
| 1:1.4 | 1.04     | 2.58                  | 60.2 | 1.62 |

<sup>a</sup> Blend solution: 16 mg/mL in CB with 3 vol% DIO; spin coating: 1200 rpm for 60 s.

**Table S5** Optimization of the active layer thickness for PSezTITI:PC<sub>71</sub>BM solar cells.<sup>a</sup>

| Thickness | $V_{oc}$ | $J_{sc}$              | FF   | PCE  |
|-----------|----------|-----------------------|------|------|
| [nm]      | [V]      | [mA/cm <sup>2</sup> ] | [%]  | [%]  |
| 87        | 1.03     | 3.37                  | 56.0 | 1.95 |
| 95        | 1.05     | 3.68                  | 54.4 | 2.10 |
| 104       | 1.06     | 3.60                  | 55.5 | 2.12 |
| 109       | 1.02     | 3.81                  | 56.4 | 2.20 |
| 115       | 1.03     | 3.66                  | 53.5 | 2.03 |

<sup>a</sup> D/A ratio: 1:0.8 (w/w); blend solution: 16 mg/mL in CB with 3 vol% DIO.

**Table S6** Optimization of the additive content for PSezTITI:PC<sub>71</sub>BM solar cells.<sup>a</sup>

| DIO      | $V_{oc}$ | $J_{sc}$              | FF   | PCE  |
|----------|----------|-----------------------|------|------|
| [v/v, %] | [V]      | [mA/cm <sup>2</sup> ] | [%]  | [%]  |
| 0        | 1.02     | 0.48                  | 45.4 | 0.22 |
| 1        | 1.03     | 1.30                  | 55.1 | 0.74 |
| 2        | 1.04     | 3.25                  | 57.3 | 1.93 |
| 3        | 1.05     | 3.75                  | 59.6 | 2.36 |
| 4        | 1.04     | 3.21                  | 57.6 | 1.93 |
| 5        | 1.03     | 3.16                  | 55.0 | 1.80 |

<sup>a</sup> D/A ratio: 1:0.8 (w/w); blend solution: 16 mg/mL in CB; spin coating: 1000 rpm for 60 s.

## 8. AFM

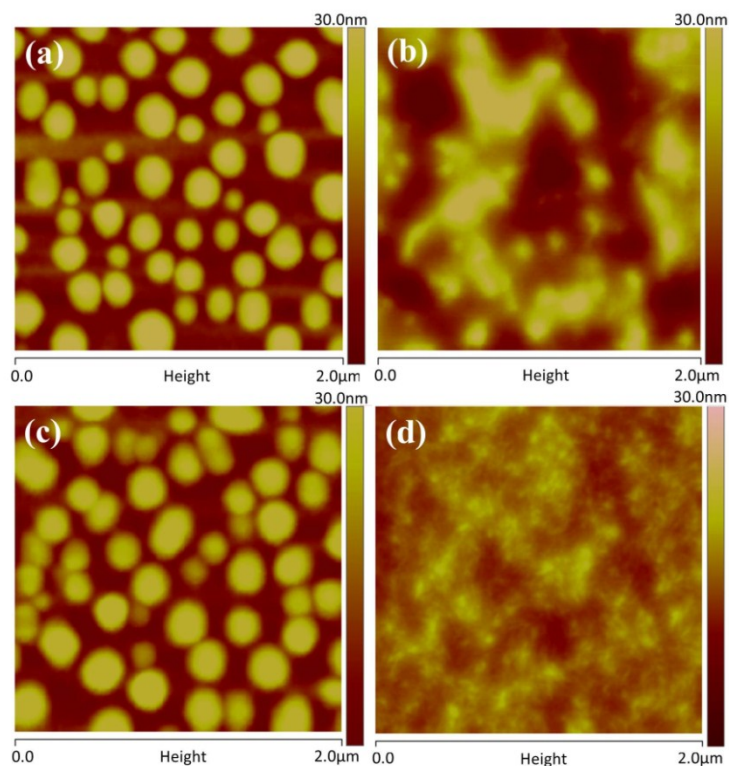

**Fig. S7** AFM height images for PThzTITl:PC<sub>71</sub>BM (top) and PSezTITl:PC<sub>71</sub>BM (bottom) blend films without ((a), (c)) or with 3% DIO ((b), (d)).

## 9. XRD

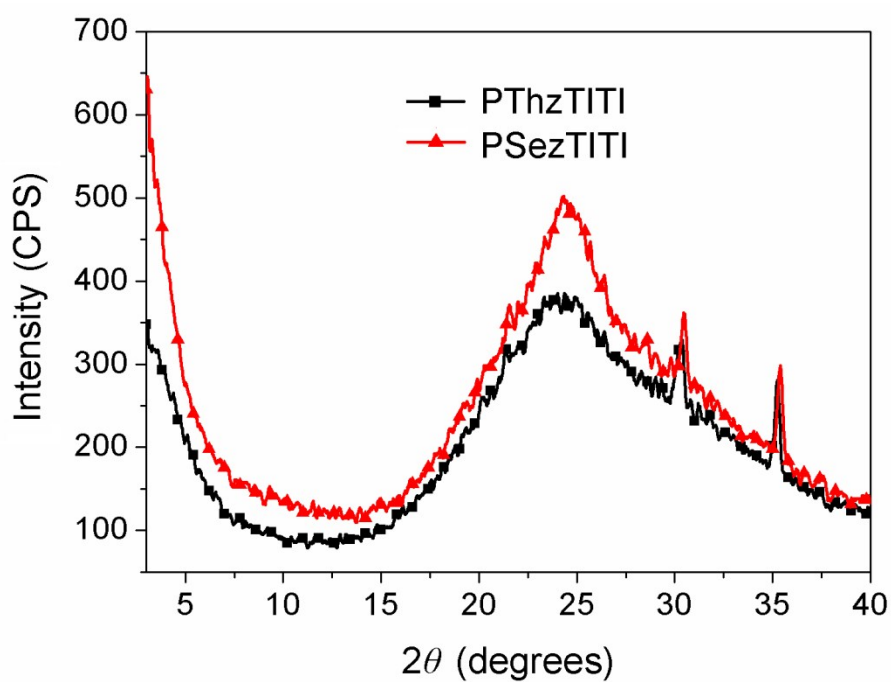

**Fig. S8** XRD patterns for as-cast polymer films on ITO glass.

## References

- [1] Y. Ma, Q. Zheng, L. Wang, D. Cai, C. Tang, M. Wang, Z. Yin and S.-C. Chen, *J. Mater. Chem. A*, 2014, **2**, 13905.
- [2] R. S. Ashraf, A. J. Kronemeijer, D. I. James, H. Sirringhaus and I. McCulloch, *Chem. Commun.*, 2012, **48**, 3939.
